# Supplementary material for: Factors influencing choice of treatment for proximal humeral fractures elaborated in a Delphi consensus process
Source: Springer Nature journal article supplement (doi:10.1007/s00402-023-05028-0), 2023-09-02
Supplement: MOESM2 [file 25998374]

## Runde 2 des Delphi-Konsens zu proximalen Humerusfrakturen

Sehr geehrte Kolleginnen und Kollegen,  
vielen Dank für Ihre Teilnahme an der ersten Runde dieses  
Delphi-Konsens-Prozesses zur Behandlung von proximalen  
Humerusfrakturen.

Im Nachfolgenden werden Ihnen die Ergebnisse der 18  
Teilnehmenden der ersten Umfragerunde präsentiert.

## Runde 2 des Delphi-Konsens zu proximalen Humerusfrakturen

### Ergebnisse der ersten Runde für die frakturassoziierten Faktoren

| ANTWORTOPTIONEN                                 | BEANTWORTUNGEN |    |
|-------------------------------------------------|----------------|----|
| 2-/3-/4-Part-Fraktur <sup>1</sup>               | 38.89%         | 7  |
| Dislozierte Tuberkula <sup>2</sup>              | 83.33%         | 15 |
| Headsplit-Fraktur <sup>3</sup>                  | 94.44%         | 17 |
| Luxationsfraktur <sup>2</sup>                   | 88.89%         | 16 |
| Varische / valgische Stellung <sup>4</sup>      | 66.67%         | 12 |
| Posteromediale Extension <sup>5</sup>           | 5.56%          | 1  |
| Metaphysäre Trümmerzone <sup>5</sup>            | 50.00%         | 9  |
| Zerstörung des medialen Scharniers <sup>5</sup> | 55.56%         | 10 |
| Fragmentdislokation subakromial                 | 11.11%         | 2  |
| Akute Läsion der Rotatorenmanschette            | 0.00%          | 0  |
| Osteoporose                                     | 5.56%          | 1  |
| Befragte insgesamt: 18                          |                |    |

Somit wurde ein Konsens für die folgenden drei Faktoren erlangt:

- Headsplit-Fraktur
- Luxationsfraktur
- Dislozierte Tuberkula

## Runde 2 des Delphi-Konsens zu proximalen Humerusfrakturen

In den Freitextfeldern wurden folgende Faktoren ergänzt:

- Kalottenbeschaffenheit zur Verankerungsmöglichkeit
- Glenoidbeschaffenheit

Diese werden nun in die Liste der potentiell relevanten  
frakturassoziierten Faktoren aufgenommen.

Trotz des bereits erlangten Konsens für die genannten  
drei Faktoren muss nun nach Ergänzung der neuen  
Faktoren erneut der Konsens abgefragt werden.

## Runde 2 des Delphi-Konsens zu proximalen Humerusfrakturen

\* 1. Bitte versuchen Sie nun vor dem Hintergrund der Umfrageergebnisse der ersten Runde erneut die für Sie **3 wichtigsten Frakturkriterien** zu identifizieren und als relevant zu benennen.

Die Prozentangaben in Klammern stellen die Umfrageergebnisse der letzten Runde dar.

Das Ziel ist hierbei die Evaluierung der Frage, wie wichtig die einzelnen Faktoren für Sie zur Indikationsstellung bei proximalen Humerusfrakturen sind, um zwischen den verschiedenen Behandlungsmethoden (konservativ, osteosynthetisch, endoprothetisch) zu entscheiden.

- |                                                              |                                                                             |
|--------------------------------------------------------------|-----------------------------------------------------------------------------|
| <input type="checkbox"/> 2-/3-/4-Part-Fraktur (39%)          | <input type="checkbox"/> Zerstörung des medialen Scharniers (56%)           |
| <input type="checkbox"/> Dislozierte Tuberkula (83%)         | <input type="checkbox"/> Fragmentdislokation subakromial (11%)              |
| <input type="checkbox"/> Headsplit-Fraktur (94%)             | <input type="checkbox"/> Akute Läsion der Rotatorenmanschette (0%)          |
| <input type="checkbox"/> Luxationsfraktur (89%)              | <input type="checkbox"/> Osteoporose (6%)                                   |
| <input type="checkbox"/> Varische / valgische Stellung (67%) | <input type="checkbox"/> Kalottenbeschaffenheit zur Verankerungsmöglichkeit |
| <input type="checkbox"/> Posteromediale Extension (6%)       | <input type="checkbox"/> Glenoidbeschaffenheit                              |
| <input type="checkbox"/> Metaphysäre Trümmerzone (50%)       |                                                                             |

Anmerkungen und Ergänzungen

## Runde 2 des Delphi-Konsens zu proximalen Humerusfrakturen

### Ergebnisse der ersten Runde für die patientenassoziierten Faktoren

| ANTWORTOPTIONEN                                                  | BEANTWORTUNGEN |    |
|------------------------------------------------------------------|----------------|----|
| Alter                                                            | 83.33%         | 15 |
| Geschlecht                                                       | 11.11%         | 2  |
| Hoher körperlicher Anspruch                                      | 55.56%         | 10 |
| Multiple Vorerkrankungen                                         | 38.89%         | 7  |
| Demenz                                                           | 50.00%         | 9  |
| Pflegebedürftigkeit                                              | 38.89%         | 7  |
| Körperliche Behinderung des kontralateralen Armes oder der Beine | 66.67%         | 12 |
| Palliative Situation                                             | 50.00%         | 9  |
| Substanzabhängigkeit                                             | 38.89%         | 7  |
| Nikotinabusus                                                    | 0.00%          | 0  |
| Orale Antikoagulation                                            | 5.56%          | 1  |
| Defektarthropathie                                               | 61.11%         | 11 |
| Befragte insgesamt: 18                                           |                |    |

Somit wurde ein Konsens für den folgenden Faktor  
erlangt:

- Alter

## Runde 2 des Delphi-Konsens zu proximalen Humerusfrakturen

In den Freitextfeldern wurde folgender Faktor ergänzt:

- Patientenwunsch

Dieser wird nun in die Liste der potentiell relevanten patientenassoziierten Faktoren aufgenommen.

Trotz des bereits erlangten Konsens für den genannten Faktor muss nun nach Ergänzung des neuen Faktors erneut der Konsens abgefragt werden.

## Runde 2 des Delphi-Konsens zu proximalen Humerusfrakturen

\* 2. Bitte versuchen Sie nun vor dem Hintergrund der Umfrageergebnisse der ersten Runde erneut die für Sie **3 wichtigsten patientenassoziierten Faktoren** aus den unten genannten Kriterien zu identifizieren und als relevant zu benennen.

Die Prozentangaben in Klammern stellen die Umfrageergebnisse der letzten Runde dar.

Das Ziel ist hierbei die Evaluierung der Frage, wie wichtig die einzelnen Faktoren für Sie zur Indikationsstellung bei proximalen Humerusfrakturen sind, um zwischen den verschiedenen Behandlungsmethoden (konservativ, osteosynthetisch, endoprothetisch) zu entscheiden.

- |                                                                                                 |                                                     |
|-------------------------------------------------------------------------------------------------|-----------------------------------------------------|
| <input type="checkbox"/> Alter (83%)                                                            | <input type="checkbox"/> Palliative Situation (50%) |
| <input type="checkbox"/> Geschlecht (11%)                                                       | <input type="checkbox"/> Substanzabhängigkeit (39%) |
| <input type="checkbox"/> Hoher körperlicher Anspruch (56%)                                      | <input type="checkbox"/> Nikotinabusus (0%)         |
| <input type="checkbox"/> Multiple Vorerkrankungen (39%)                                         | <input type="checkbox"/> Orale Antikoagulation (6%) |
| <input type="checkbox"/> Demenz (50%)                                                           | <input type="checkbox"/> Defektarthropathie (61%)   |
| <input type="checkbox"/> Pflegebedürftigkeit (39%)                                              | <input type="checkbox"/> Patientenwunsch            |
| <input type="checkbox"/> Körperliche Behinderung des kontralateralen Armes oder der Beine (67%) |                                                     |

Anmerkungen und Ergänzungen

## Runde 2 des Delphi-Konsens zu proximalen Humerusfrakturen

3. Gibt es Ihrer Meinung nach weitere Faktoren, welche unbedingt die Therapieentscheidung beeinflussen? Wenn ja, bitten wir Sie, diese hier zu ergänzen.

4. Haben Sie Anmerkungen zu den oben erwähnten therapielevanten Faktoren oder Ergänzungen?
